# Supplementary material for: Adsorption Kinetics of Methyl Orange from Model Polluted Water onto N-Doped Activated Carbons Prepared from N-Containing Polymers
Source: MDPI journal article supplement (doi:10.3390/polym15091983), 2023-04-22
Supplement: s1 [file s1]

*Article*

# **Adsorption Kinetics of Methyl Orange from Model Polluted Water onto N-Doped Activated Carbons Prepared from N-Containing Polymers**

**Abdel-Basit Al-Odayni <sup>1,\*</sup>, Faisal S. Alsubaie <sup>2</sup>, Naaser A. Y. Abdu <sup>2</sup>, Haifa Masfeer Al-Kahtani <sup>2</sup>, and Waseem Sharaf Saeed <sup>1</sup>**

<sup>1</sup> Engineer Abdullah Bugshan Research Chair for Dental and Oral Rehabilitation, College of Dentistry, King Saud University, Riyadh 11545, Saudi Arabia

<sup>2</sup> Department of Chemistry, College of Science, King Saud University, Riyadh 11451, Saudi Arabia; 439106262@student.ksu.edu.sa (N.A.Y.A.)

\* Correspondence: aalodayni@ksu.edu.sa

**Supplementary Data:**

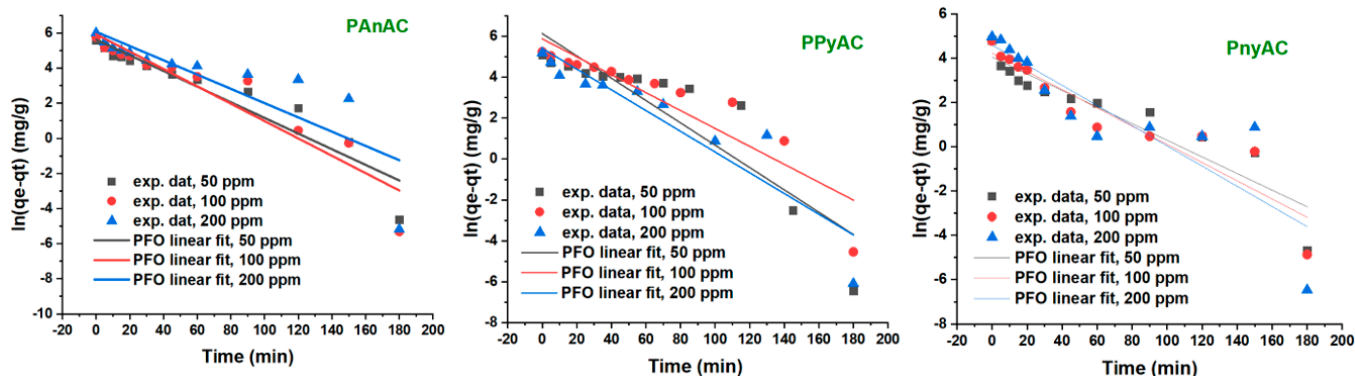

Figure S1. Kinetic adsorption plots of pseudo-first order (PFO) models. Operating conditions: methyl orange (MO) initial concentration ( $C_0$ ) = 50, 100, and 200 ppm; MO volume = 250 mL; dosage = 40 mg; pH = 6.4; mixing speed = 150 rpm; temperature = 24 °C; contact time = 0–180 min.

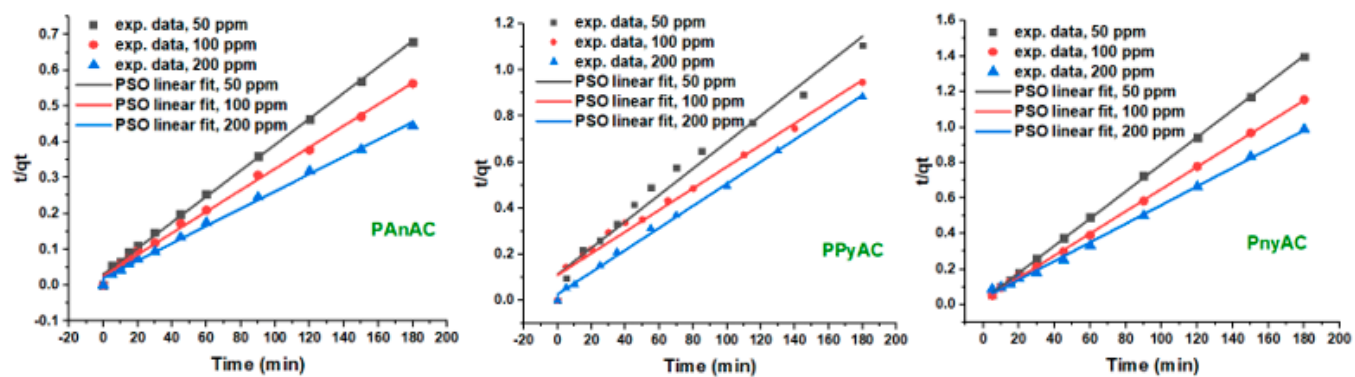

Figure S2. Kinetic adsorption plots of pseudo-second order (PSO) models. Operating conditions: see Figure S1.

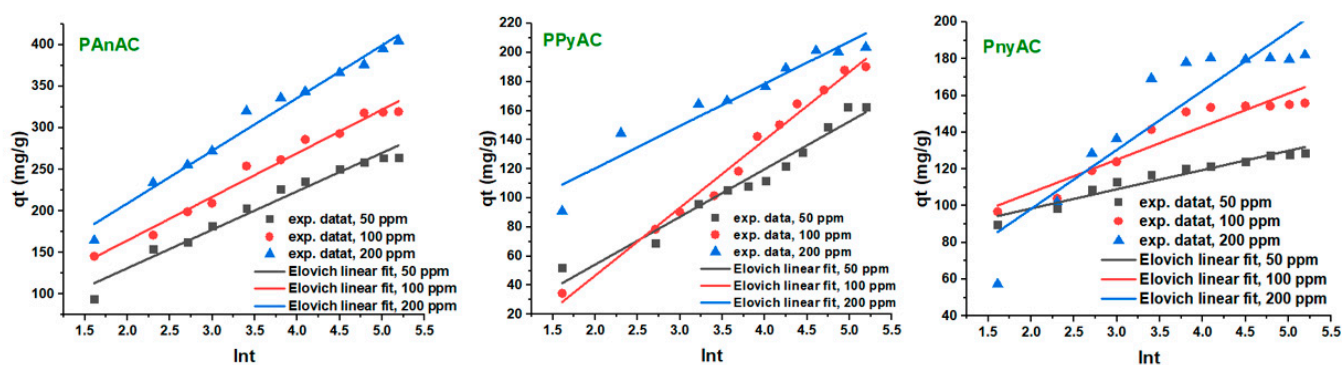

Figure S3. Kinetic adsorption plots of Elovich models. Operating conditions: see Figure S1.

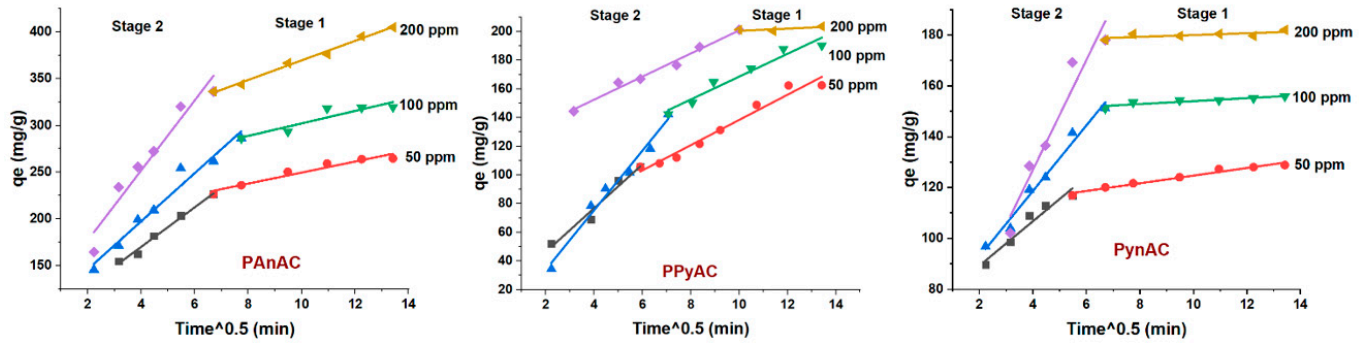

Figure S4. The two-stage intraparticle diffusion model. Operating conditions: see Figure S1.

Table S1. The linear and nonlinear equations for PFO, PSO, Elovich, IPD and LFD kinetic models

| Kinetic models | Linear                                                          |                          | Nonlinear                                     |               | Constants                                          | ref |
|----------------|-----------------------------------------------------------------|--------------------------|-----------------------------------------------|---------------|----------------------------------------------------|-----|
|                | Equation                                                        | Plot                     | Equation                                      | Plot          |                                                    |     |
| PFO            | $\ln(q_e - q_t) = \ln q_e - k_1 t$                              | $\ln(q_e - q_t)$ vs. $t$ | $q_t = q_e(1 - e^{-k_1 t})$                   | $q_t$ vs. $t$ | $k_1$ (min <sup>-1</sup> )                         | [1] |
| PSO            | $\frac{t}{q_t} = \frac{1}{k_2 q_e t} + \frac{t}{q_t}$           | $t/q_t$ vs. $t$          | $q_t = \frac{k_2 q_e^2 t}{1 + k_2 q_e t}$     | $q_t$ vs. $t$ | $k_2$ (g/mg min);<br>$h = k_2 q_e^2$ (mg/g min)    | [2] |
| Elovich        | $qt = \frac{1}{\beta} \ln(\alpha\beta) + \frac{1}{\beta} \ln t$ | $q_t$ vs. $\ln t$        | $qt = \frac{1}{\beta} \ln(1 + \alpha\beta t)$ | $q_t$ vs. $t$ | $\alpha$ (mg/g min);<br>$\beta$ (g/mg)             | [3] |
| IPD            | $q_t = k_{id} t^{0.5} + C$                                      | $q_t$ vs. $t^{0.5}$      | -                                             | -             | $k_{id}$ (mg/g min <sup>0.5</sup> );<br>$C$ (mg/g) | [4] |
| LFD            | $-\ln(1 - F) = k_{fd} t + C,$<br>$F = \frac{q_t}{q_e}$          | $-\ln(1 - F)$ vs. $t$    | -                                             | -             | $k_{fd}$ (min <sup>-1</sup> ); $C$ (mg/g)          | [5] |

Table S2. Thermogravimetric analysis (TGA) results for polymeric precursors, activated carbons before and after adsorption process.

| Steps             | Property      | PAn                                        | PPy     | Pny     | PAnAC   | PPyAC            | PnyAC   | PAnAC-MO | PPyAC-MO | PnyAC-MO |
|-------------------|---------------|--------------------------------------------|---------|---------|---------|------------------|---------|----------|----------|----------|
| Step 1            | Temp. (°C)    | 25–153                                     | 25–153  | 25–153  | 25–153  | 25–153           | 25–153  | 25–208   | 25–208   | 25–208   |
|                   | Mass Loss (%) | 7.4                                        | 6.0     | 6.7     | 10.9    | 12.1             | 13.5    | 11.2     | 11.8     | 9.8      |
|                   | DTG (°C)      | 95                                         | 85      | 105     | 86      | 81               | 77      | 98       | 103      | 92       |
|                   | Assig.        | Adsorbed volatiles                         |         |         |         |                  |         |          |          |          |
| Step 2            | Temp. (°C)    | 154–255                                    | 154–255 | 154–255 | 154–326 | 154–326          | 154–417 | 209–474  | 209–474  | 209–474  |
|                   | Mass Loss (%) | 8.2                                        | 6.2     | 7.8     | 6.0     | 7.1              | 7.1     | 14.3     | 15.3     | 9.6      |
|                   | DTG (°C)      | 221                                        | 230     | 229     | 248     | 268              | 366     | 381      | 378      | 370      |
|                   | Assig.        | Weak parts and sensitive functional groups |         |         |         |                  |         |          |          |          |
| Step 3            | Temp. (°C)    | 256–419                                    | 256–419 | 256–419 | 327–417 | 327–785          | -       | -        | -        | -        |
|                   | Mass Loss (%) | 14.7                                       | 17.2    | 15.5    | 2.5     | 23               | -       | -        | -        | -        |
|                   | DTG (°C)      | 300                                        | 285     | 289     | 377     | 531              | -       | -        | -        | -        |
|                   | Assig.        | Oxidative process                          |         |         |         | Backbone decomp. | -       | -        | -        | -        |
| Step 4            | Temp. (°C)    | 420–686                                    | 420–850 | 420–686 | 418–785 | -                | -       | -        | -        | -        |
|                   | Mass Loss (%) | 18.9                                       | 20.5    | 17.8    | 13.8    | -                | -       | -        | -        | -        |
|                   | DTG (°C)      | 559                                        | -       | 537     | 580     | -                | -       | -        | -        | -        |
|                   | Assig.        | Carbonaceous step (C. step)                |         |         |         | -                | -       | -        | -        | -        |
| Step 5            | Temp. (°C)    | 687–950                                    | -       | 687–950 | -       | -                | -       | -        | -        | -        |
|                   | Mass Loss (%) | 7.4                                        | -       | 7.7     | -       | -                | -       | -        | -        | -        |
|                   | DTG (°C)      | 771                                        | -       | 769     | -       | -                | -       | -        | -        | -        |
|                   | Assig.        | C. step                                    | -       | C. step | -       | -                | -       | -        | -        | -        |
| Residue at 950 °C |               | 43.4                                       | 50.1    | 44.5    | 64.5    | 54.7             | 70.6    | 62.3     | 57.7     | 73.0     |

Table S3. Linear PFO, PSO, and Elovich and intraparticle kinetic models. Conditions: MO adsorbate concentration 50, 100, and 200 ppm; MO volume 250 mL; adsorbents PAnAC, PPyAC, and PnyAC dose 40 mg; pH of solutions 6.02–6.59; agitation speed 150 rpm; temperature 25 °C; contact time 0–180 min.

| Adsorbent | Conc. (mg/L) | $q_{e, \text{exp.}}$ (mg/g) | PFO linear                        |                              |       | PSO linear                        |                              |       | Elovich linear |         |       | Best fit        |
|-----------|--------------|-----------------------------|-----------------------------------|------------------------------|-------|-----------------------------------|------------------------------|-------|----------------|---------|-------|-----------------|
|           |              |                             | $10^{-3}k_1$ (min <sup>-1</sup> ) | $q_{e, \text{calc.}}$ (mg/g) | $R^2$ | $10^{-3}k_2$ (min <sup>-1</sup> ) | $q_{e, \text{calc.}}$ (mg/g) | $R^2$ | $\alpha$       | $\beta$ | $R^2$ |                 |
| PAnAC     | 50           | 264.7                       | 44.6                              | 276.5                        | 0.894 | 0.43                              | 276.2                        | 0.998 | 106.7          | 0.0216  | 0.968 | 2 <sup>nd</sup> |
|           | 100          | 319.7                       | 49.5                              | 376.5                        | 0.896 | 0.35                              | 333.3                        | 0.997 | 163.2          | 0.0190  | 0.980 | 2 <sup>nd</sup> |
|           | 200          | 405.0                       | 40.7                              | 433.7                        | 0.706 | 0.29                              | 413.2                        | 0.997 | 232.5          | 0.0158  | 0.978 | 2 <sup>nd</sup> |
| PPyAC     | 50           | 162.5                       | 54.6                              | 461.4                        | 0.807 | 0.29                              | 174.5                        | 0.974 | 23.2           | 0.0305  | 0.962 | 2 <sup>nd</sup> |
|           | 100          | 190.3                       | 43.8                              | 355.4                        | 0.838 | 0.20                              | 213.2                        | 0.978 | 17.2           | 0.0215  | 0.988 | 2 <sup>nd</sup> |
|           | 200          | 203.6                       | 50.7                              | 223.5                        | 0.857 | 0.83                              | 208.8                        | 0.998 | 248.6          | 0.0344  | 0.924 | 2 <sup>nd</sup> |
| PnyAC     | 50           | 128.8                       | 37.5                              | 57.2                         | 0.868 | 2.24                              | 130.7                        | 0.999 | 1721.6         | 0.0955  | 0.942 | 2 <sup>nd</sup> |
|           | 100          | 155.9                       | 41.2                              | 68.4                         | 0.884 | 1.51                              | 160.0                        | 0.999 | 941.4          | 0.0556  | 0.898 | 2 <sup>nd</sup> |
|           | 200          | 182.0                       | 45.6                              | 99.5                         | 0.780 | 0.78                              | 190.1                        | 0.998 | 92.4           | 0.0310  | 0.829 | 2 <sup>nd</sup> |

Table S4. Adsorption capacities for the studied adsorbents from kinetic experiments performed using adsorbent doses of 20, 40, and 80 mg per 250 mL MO solution.

| Adsorbent                          | Dose (mg) |         |         |
|------------------------------------|-----------|---------|---------|
|                                    | 20 (mg)   | 40 (mg) | 80 (mg) |
| PAnAC; $q_{e, \text{exp.}}$ (mg/g) | 318.09    | 319.73  | 287.73  |
| PPyAC; $q_{e, \text{exp.}}$ (mg/g) | 273.34    | 190.30  | 247.76  |
| PnyAC; $q_{e, \text{exp.}}$ (mg/g) | 163.04    | 155.93  | 161.04  |

Table S5. IPD two-stage results for MO adsorption onto activated carbons

| Adsorbent | Conc.<br>(mg/L) | $q_{e, \text{exp.}}$<br>(mg/g) | IPD model                               |                     |           |                                         |                     |           |
|-----------|-----------------|--------------------------------|-----------------------------------------|---------------------|-----------|-----------------------------------------|---------------------|-----------|
|           |                 |                                | Stage 1                                 |                     |           | Stage 2                                 |                     |           |
|           |                 |                                | $k_{id1}$<br>(mg/g·min <sup>0.5</sup> ) | $C_{id1}$<br>(mg/g) | $(R_1)^2$ | $k_{id2}$<br>(mg/g·min <sup>0.5</sup> ) | $C_{id2}$<br>(mg/g) | $(R_2)^2$ |
| PAnAC     | 50              | 264.7                          | 21.16                                   | 85.35               | 0.990     | 5.91                                    | 190.40              | 0.936     |
|           | 100             | 319.7                          | 25.74                                   | 94.39               | 0.966     | 6.69                                    | 235.29              | 0.854     |
|           | 200             | 405.0                          | 37.46                                   | 101.94              | 0.9939    | 10.49                                   | 264.75              | 0.992     |
| PPyAC     | 50              | 162.5                          | 15.28                                   | 15.67               | 0.69      | 9.13                                    | 46.64               | 0.955     |
|           | 100             | 190.3                          | 20.78                                   | -7.77               | 0.980     | 7.96                                    | 88.93               | 0.951     |
|           | 200             | 203.6                          | 8.06                                    | 120.24              | 0.969     | 0.76                                    | 192.88              | 0.621     |
| PnyAC     | 50              | 128.8                          | 71.71                                   | 8.75                | 0.948     | 109.60                                  | 1.51                | 0.970     |
|           | 100             | 155.9                          | 66.97                                   | 12.91               | 0.981     | 148.16                                  | 0.58                | 0.846     |
|           | 200             | 182.0                          | 40.40                                   | 21.62               | 0.941     | 176.39                                  | 0.36                | 0.511     |

## References

1. Lagegren, S.; Svenska, B. Zur theorie der sogenannten adsorption geloester stoffe. *Vaternskapsakad Handlingar* **1898**, *24*, 1-39.
2. Ho, Y.-S.; McKay, G. Pseudo-second order model for sorption processes. *Process biochemistry* **1999**, *34*, 451-465.
3. López-Luna, J.; Ramírez-Montes, L.E.; Martínez-Vargas, S.; Martínez, A.I.; Mijangos-Ricardez, O.F.; González-Chávez, M.d.C.A.; Carrillo-González, R.; Solís-Domínguez, F.A.; Cuevas-Díaz, M.d.C.; Vázquez-Hipólito, V. Linear and nonlinear kinetic and isotherm adsorption models for arsenic removal by manganese ferrite nanoparticles. *SN Applied Sciences* **2019**, *1*, 1-19.
4. Weber Jr, W.J.; Morris, J.C. Kinetics of adsorption on carbon from solution. *Journal of the sanitary engineering division* **1963**, *89*, 31-59.
5. Ali, I.; Alothman, Z.A.; Alwarthan, A. Uptake of propranolol on ionic liquid iron nanocomposite adsorbent: kinetic, thermodynamics and mechanism of adsorption. *Journal of Molecular Liquids* **2017**, *236*, 205-213.
